# Supplementary material
Source: MDPI journal article supplement (https://www.mdpi.com/2071-1050/16/10/4173)

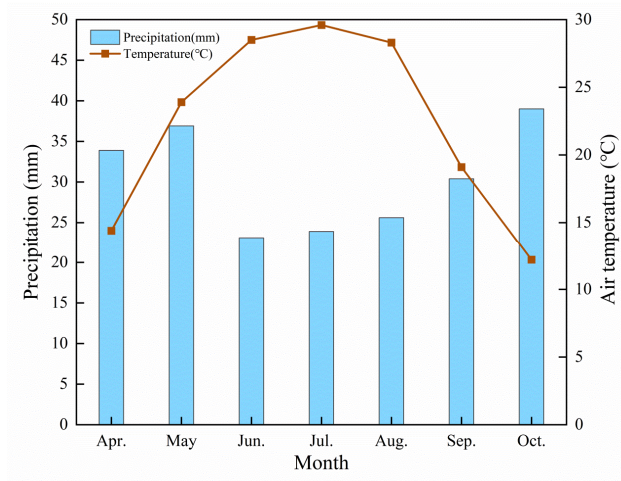

**Figure S1.** Monthly temperature and precipitation during cotton growing periods.

Supplement: s1 [file s1 › sustainability-2968904-supplementary.pdf]
